# Supplementary material for: Grape Seed Extract Positively Modulates Blood Pressure and Perceived Stress: A Randomized, Double-Blind, Placebo-Controlled Study in Healthy Volunteers
Source: PubMed Central journal article supplement (PMC7922661; doi:10.3390/nu13020654), 2021-02-17
Supplement: nutrients-13-00654-s001.pdf [file nutrients-13-00654-s001.pdf]

# Article

## Grape seed extract positively modulates blood pressure and perceived stress: a randomized, double-blind, placebo controlled study in healthy volunteers

Christiane Schön<sup>1,\*</sup>, Pietro Allegrini<sup>2</sup>, Karin Engelhart-Jentsch<sup>1</sup>, Antonella Riva<sup>2</sup>, Giovanna Petrangolini<sup>2</sup>

<sup>1</sup> BioTeSys GmbH, Schelztorstr. 54-56, 73728 Esslingen, Germany; c.schoen@biotesys.de (C.S.), k.engelhart@biotesys.de (K.E.)

<sup>2</sup> Research and Development Department, Indena SpA, 20139 Milan, Italy; pietro.allegrini@indena.com (P.A.), antonella.riva@indena.com (A.R.), giovanna.petrangolini@indena.com (G.P.)

\* Correspondence: c.schoen@biotesys; Phone: +49 (0) 711/31 05 71-45

Received: date; Accepted: date; Published: date

### Supplementary Figures

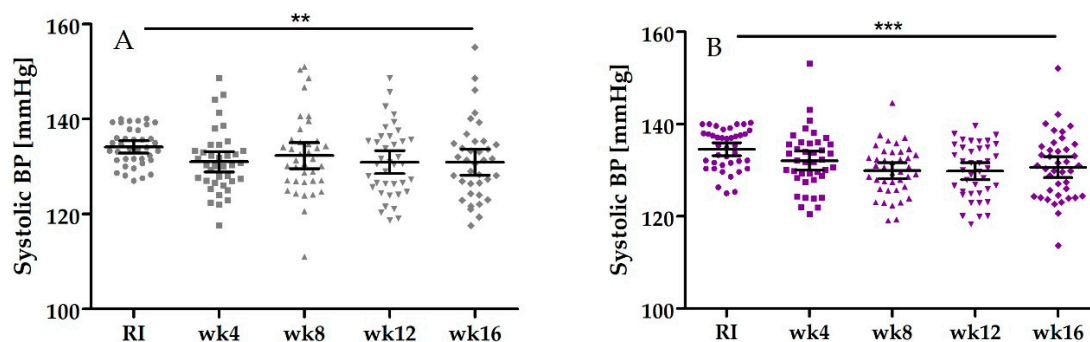

**Figure S1.** Distribution of systolic blood pressure from 7-day diary in placebo (A, in grey) and in GSEe (B, in purple ♦) group [mmHg]. Scatter diagram with mean  $\pm$ 95 % CI.

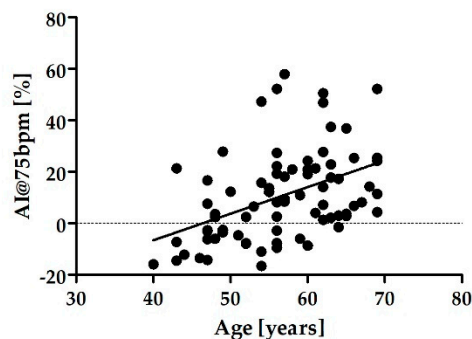

**Figure S2.** Correlation of Age with augmentation index AI75 of all subjects at baseline measurement. Pearson  $r=0.4395$ ;  $p<0.0001$
